# Supplementary material for: Analysis of 953 Human Proteins from a Mitochondrial HEK293 Fraction by Complexome Profiling
Source: PubMed Central journal article supplement (PMC3720734; doi:10.1371/journal.pone.0068340), 2013-07-23

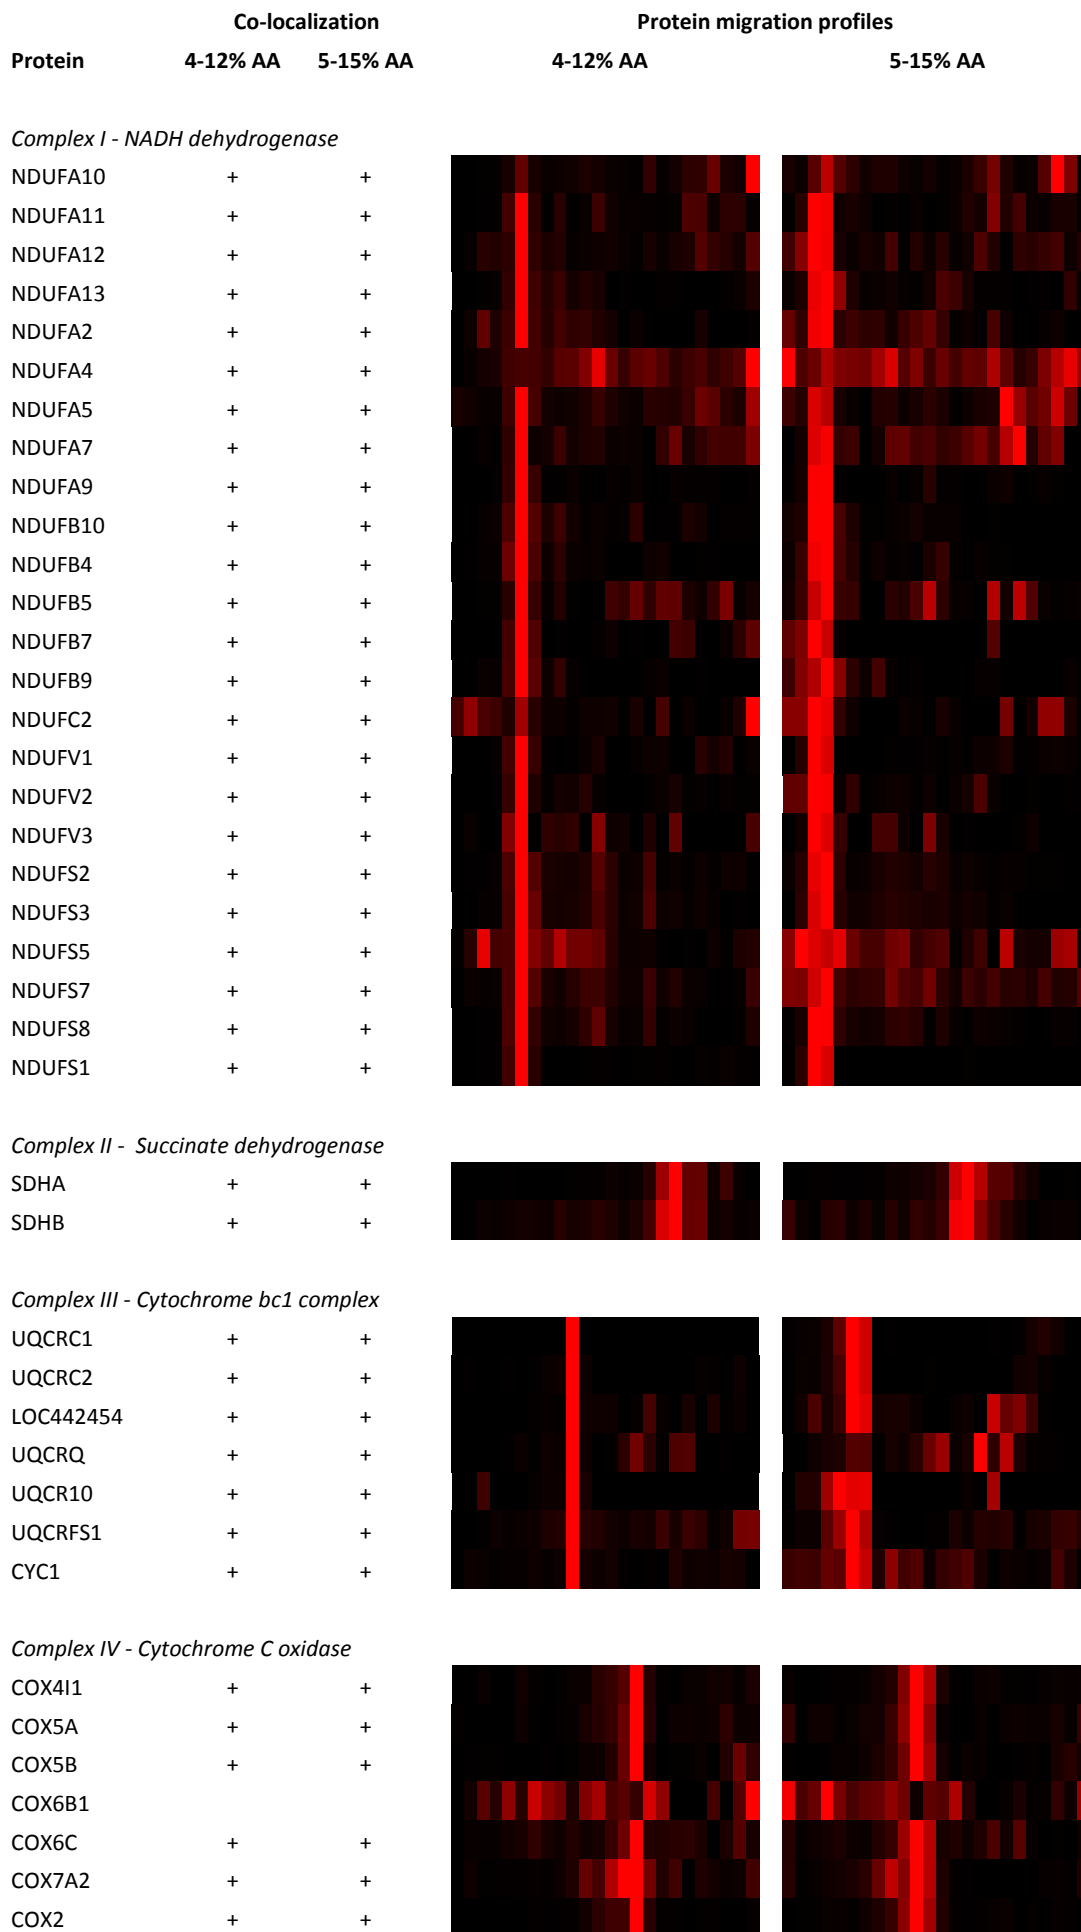

*Complex V - ATP synthase*

|              |   |   |
|--------------|---|---|
| ATP5A1       | + | + |
| ATP5F1       | + | + |
| ATP5B        | + | + |
| ATP5H        | + | + |
| ATP5D        | + | + |
| ATP5I        | + | + |
| ATP5J2       | + | + |
| ATP5L        | + | + |
| ATP5C1       | + | + |
| ATP5O        | + | + |
| ATP5J2-PTCD1 | + | + |

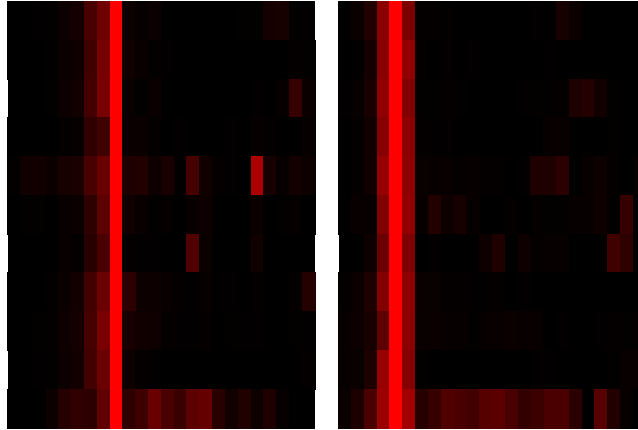

*TCP containing chaperone complex*

|       |   |   |
|-------|---|---|
| TCP1  | + | + |
| CCT2  | + | + |
| CCT4  | + | + |
| CCT5  | + | + |
| CCT7  | + | + |
| CCT3  | + | + |
| CCT8  | + | + |
| CCT6A | + | + |

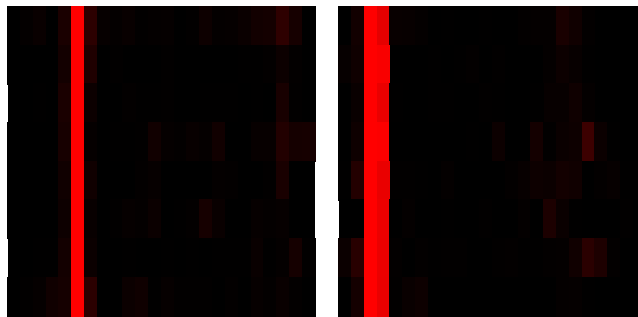

*Isocitrate dehydrogenase*

|       |   |   |
|-------|---|---|
| IDH3A | + | + |
| IDH3B | + | + |
| IDH3B | + | + |
| IDH3G | + | + |

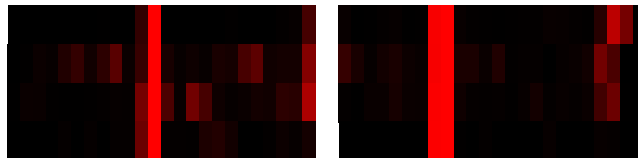

*28S mitochondrial ribosome*

|         |   |   |
|---------|---|---|
| MRPS10  | + | + |
| MRPS11  | + | + |
| MRPS14  | + | + |
| MRPS15  | + | + |
| MRPS16  | + | + |
| MRPS17  | + | + |
| MRPS18B | + | + |
| MRPS2   | + | + |
| MRPS21  | + | + |
| MRPS22  | + | + |
| MRPS23  | + | + |
| MRPS24  | + | + |
| MRPS25  | + | + |
| MRPS26  | + | + |
| MRPS27  | + | + |
| MRPS28  | + | + |
| DAP3    | + | + |
| MRPS30  | + | + |
| MRPS31  | + | + |

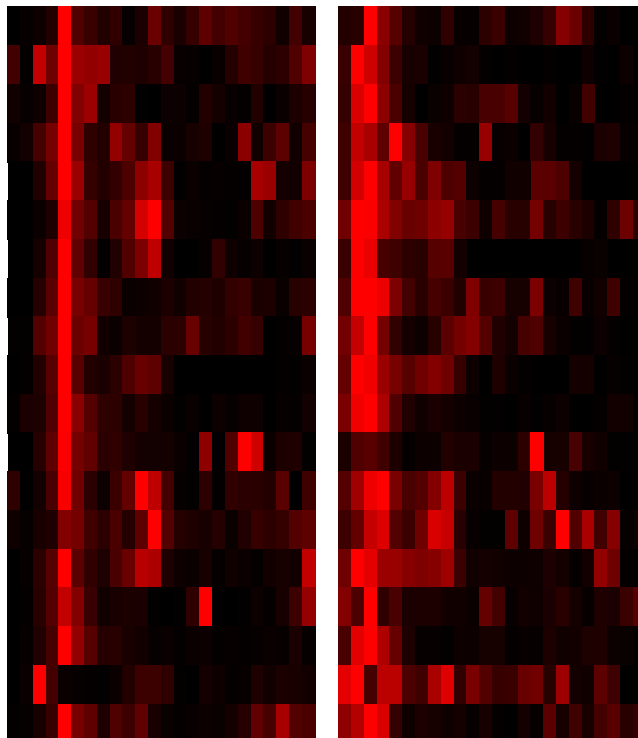

|        |   |   |
|--------|---|---|
| MRPS34 | + | + |
| MRPS35 | + | + |
| MRPS5  | + | + |
| MRPS7  | + | + |
| MRPS9  | + | + |

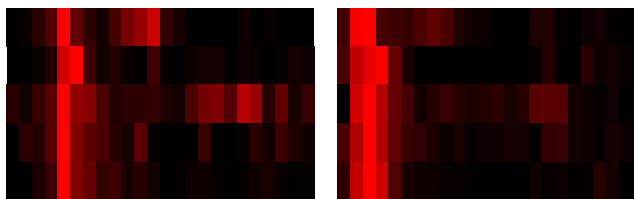

*39S mitochondrial ribosome*

|        |   |   |
|--------|---|---|
| MRPL1  | + | + |
| MRPL10 |   |   |
| MRPL11 |   |   |
| MRPL12 |   |   |
| MRPL13 | + | + |
| MRPL14 |   |   |
| MRPL15 | + | + |
| MRPL17 | + | + |
| MRPL18 | + | + |
| MRPL19 | + | + |
| MRPL2  | + | + |
| MRPL21 | + | + |
| MRPL22 | + | + |
| MRPL23 | + | + |
| MRPL24 | + | + |
| MRPL3  | + | + |
| MRPL37 | + | + |
| MRPL38 | + | + |
| MRPL39 | + | + |
| MRPL4  | + | + |
| MRPL41 | + | + |
| MRPL43 | + | + |
| MRPL44 | + | + |
| MRPL45 | + | + |
| MRPL46 |   |   |
| MRPL48 |   |   |
| MRPL49 | + | + |
| MRPL53 |   |   |
| MRPL9  | + | + |

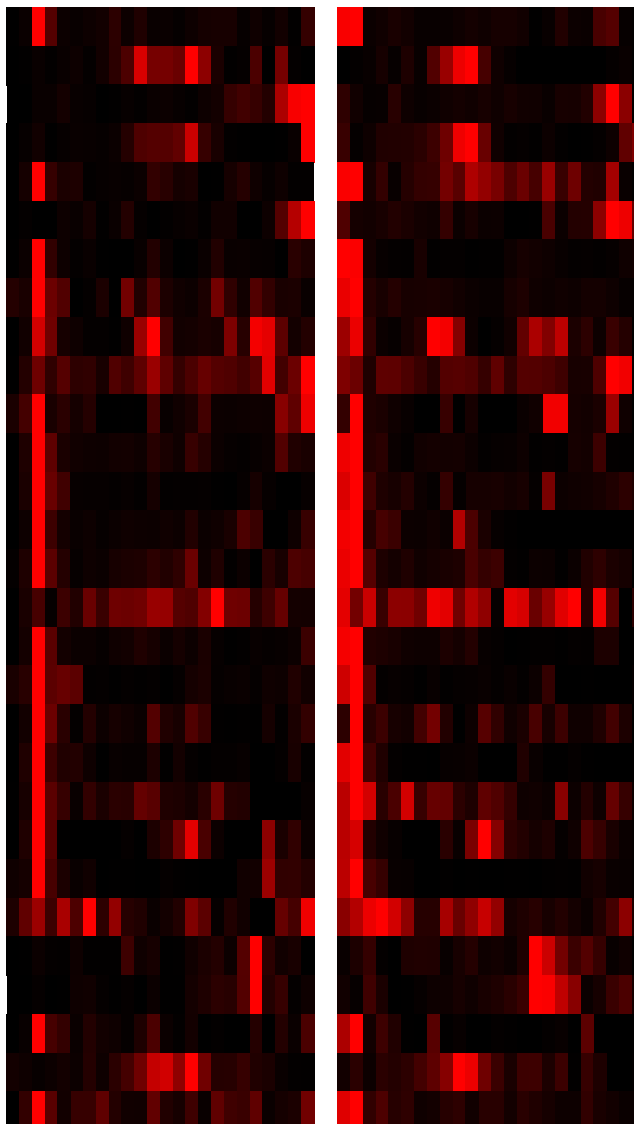

*Pyruvate dehydrogenase*

|       |  |  |
|-------|--|--|
| PDHA1 |  |  |
| PDHB  |  |  |
| PDPR  |  |  |

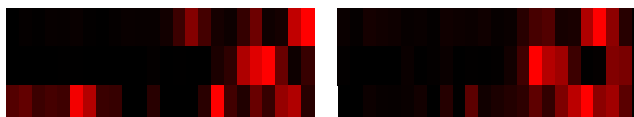

*propionyl-CoA carboxylase*

|      |   |   |
|------|---|---|
| PCCA | + | + |
| PCCB | + | + |

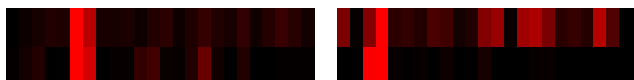

*Prohibitin complex*

|      |   |   |
|------|---|---|
| PHB  | + | + |
| PHB2 | + | + |

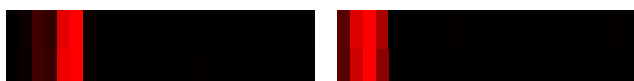

*2-oxoisovalerate dehydrogenase*

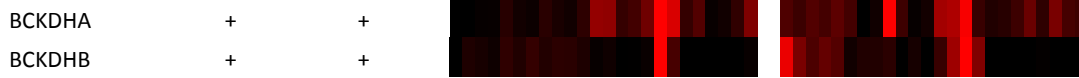

*electron transfer flavoprotein*

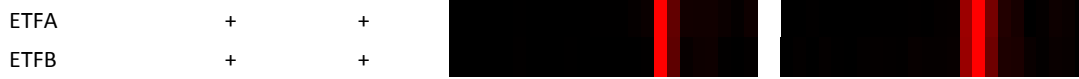

*Trifunctional enzyme*

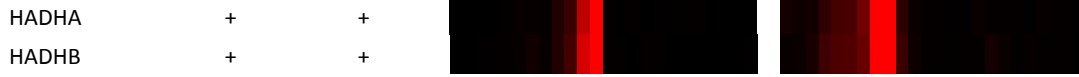

**Non-mitochondrial complexes**

*Proteasome*

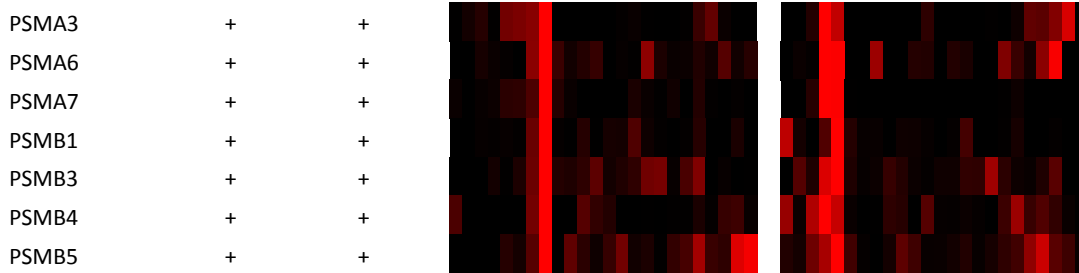

*Integrin complex*

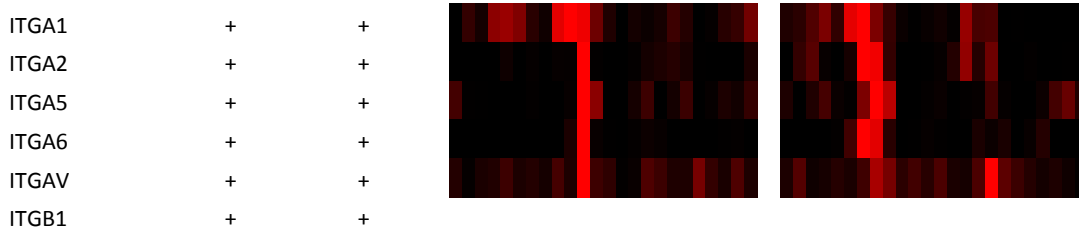

*V-type proton ATPase: V1 part*

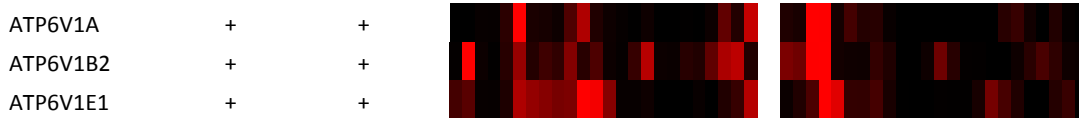

*V-type proton ATPase: V0 part*

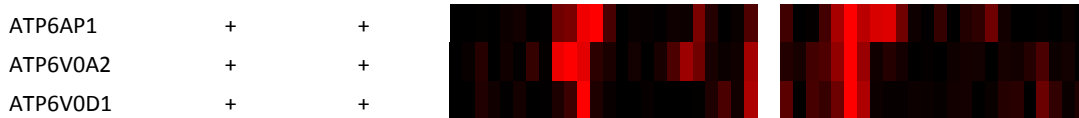

*dolichyl-diphosphooligosaccharide--protein glycosyltransferase*

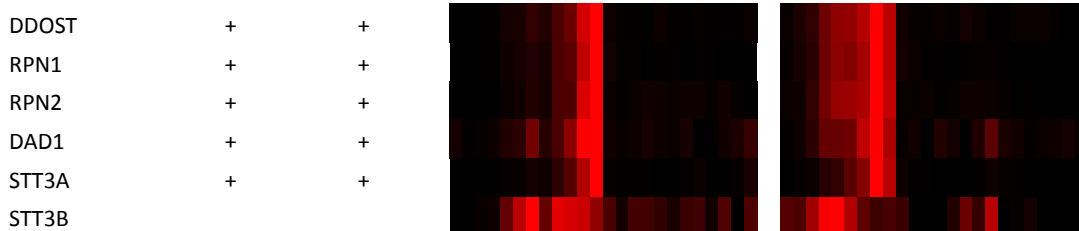

*beta-hexosaminidase*

HEXA + +  
HEXB + +

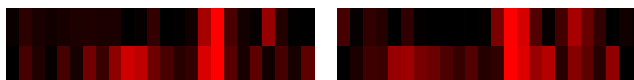

*40S Ribosome*

RPS13 + +  
RPS15A +  
RPS16 + +  
RPS18 +  
RPS19 +  
RPS2 + +  
RPS24 + +  
RPS3 +  
LOC100130107  
RPS4X + +  
RPS5 + +  
RPS6 + +  
RPS7 +  
RPS8 + +  
RPS9 + +  
RPSA

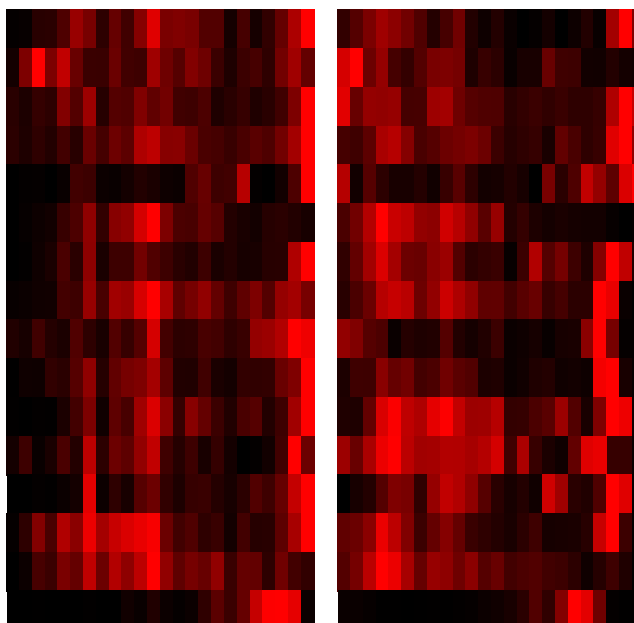

*60S Ribosome*

RPLP0 + +  
RPLP2 +  
RPL10 + +  
RPL10A  
RPL11 +  
RPL12 +  
RPL13 + +  
RPL13A + +  
RPL14 + +  
RPL15 + +  
LOC729046 + +  
RPL18 + +  
RPL18A + +  
RPL19 + +  
RPL21 + +  
RPL22  
RPL23  
RPL24 + +  
RPL26 +  
RPL27A + +  
LOC653881 + +  
RPL30 +  
RPL31  
RPL32 +  
RPL35A + +  
RPL4 + +  
RPL5

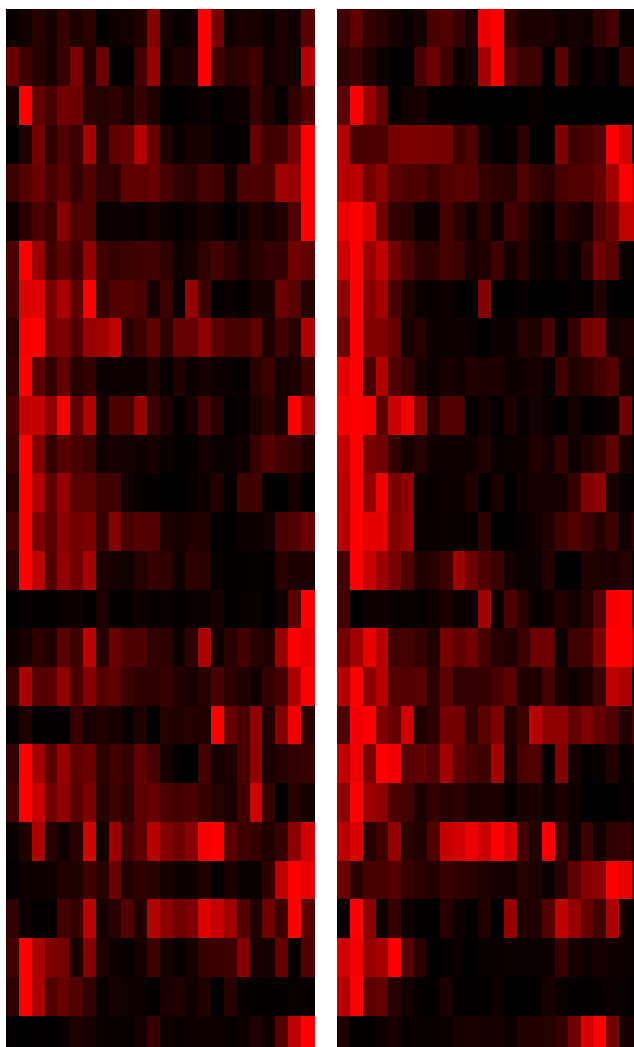

RPL6  
RPL7  
RPL7A  
RPL8  
RPL9

+  
+  
+

+  
+  
+

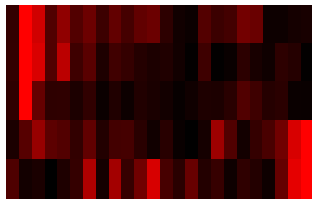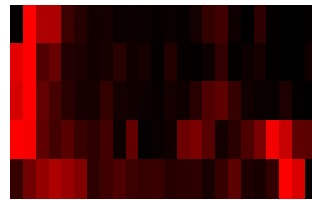

Supplement: pone.0068340.s004.pdf [file pone.0068340.s004.pdf]
